# Supplementary material
Source: PubMed Central journal article supplement (PMC3085095)
Supplement: NIHMS260581-supplement-1_si_001.pdf [file NIHMS260581-supplement-1_si_001.pdf]

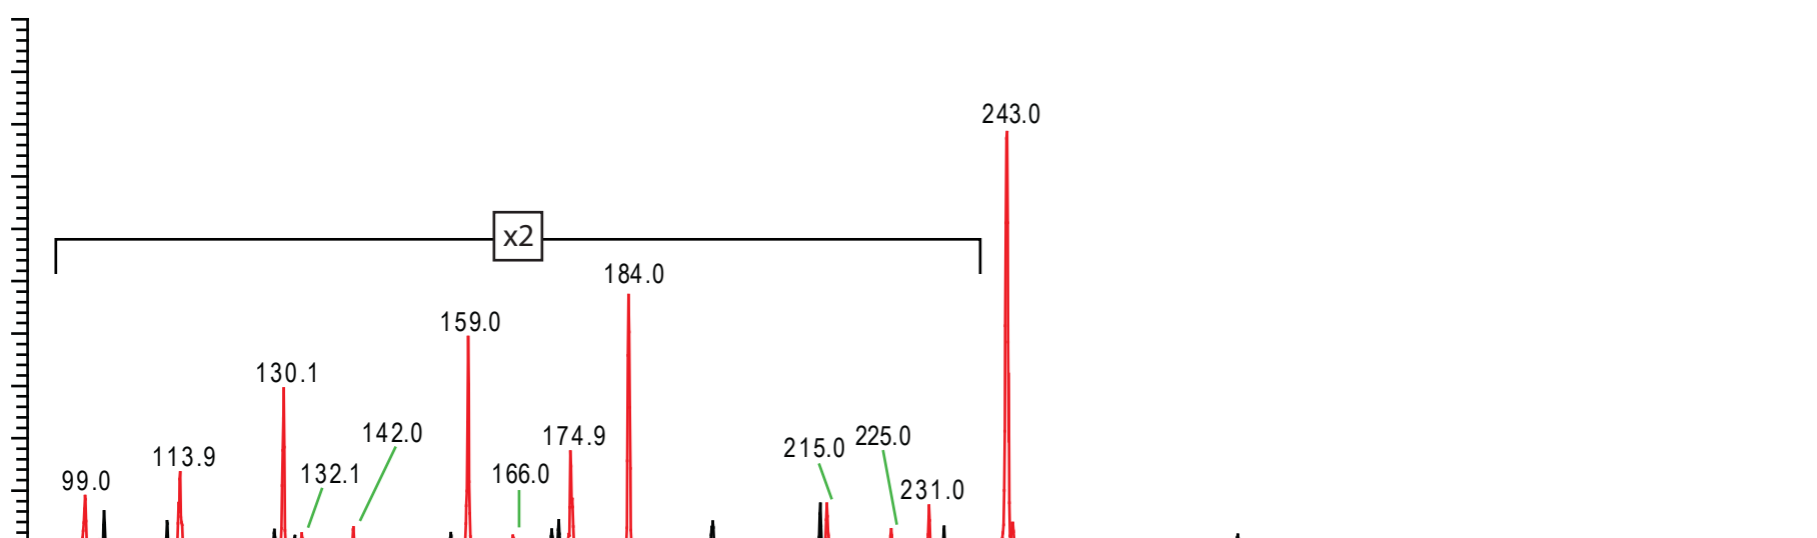

| Fragment | m/z   |
|----------|-------|
| a        | 132.1 |
| b        | 142.1 |
| c        | 149.1 |
| d        | 159.1 |
| e        | 166.1 |
| f        | 175.1 |
| g        | 184.1 |
| h        | 205.1 |
| i        | 215.1 |
| j        | 225.1 |
| k        | 231.1 |
| l        | 243.1 |

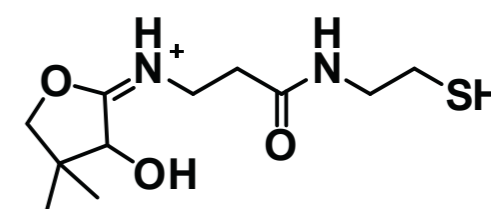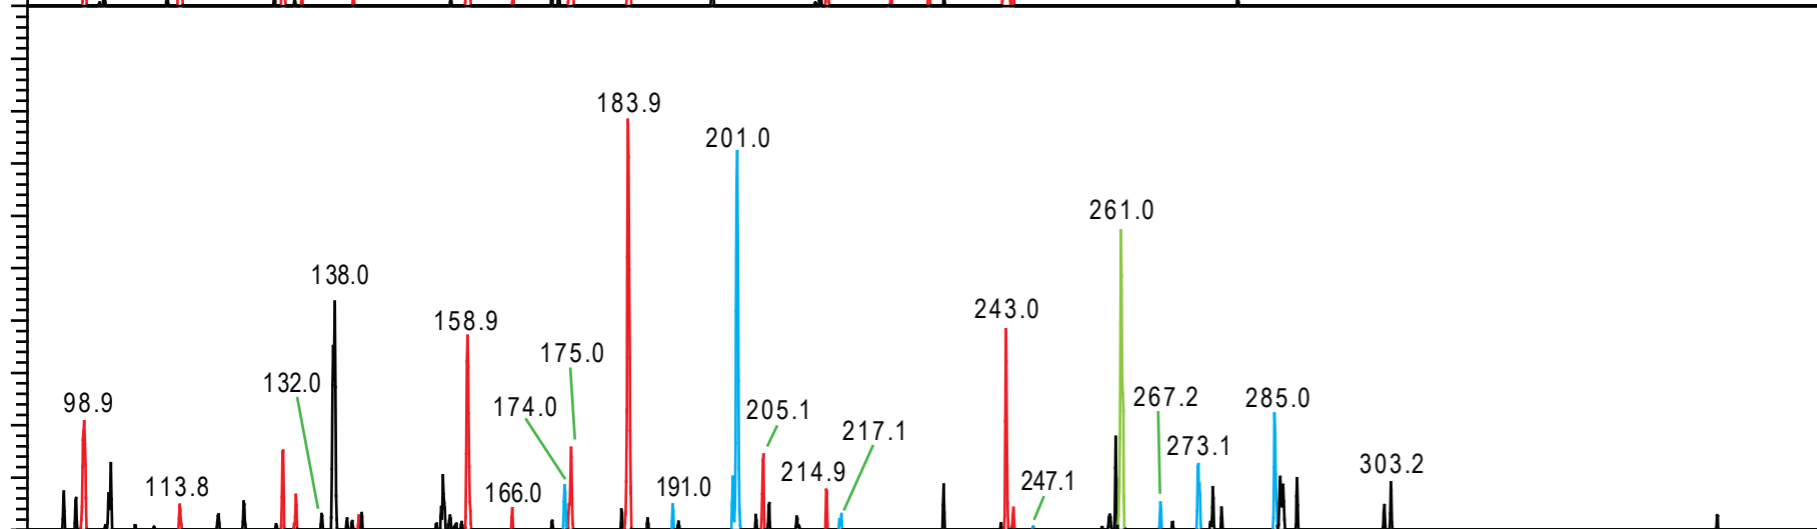

| Fragment | m/z   | +42 Da m/z |
|----------|-------|------------|
| a        | 132.1 | 174.1      |
| b        | 142.1 | -          |
| c        | 149.1 | 191.1      |
| d        | 159.1 | 201.1      |
| e        | 166.1 | -          |
| f        | 175.1 | 217.1      |
| g        | 184.1 | -          |
| h        | 205.1 | 247.1      |
| i        | 215.1 | 257.1      |
| j        | 225.1 | 267.1      |
| k        | 231.1 | 273.1      |
| l        | 243.1 | 285.1      |

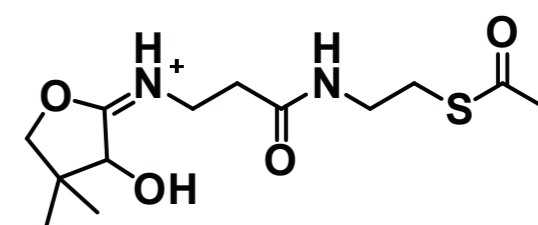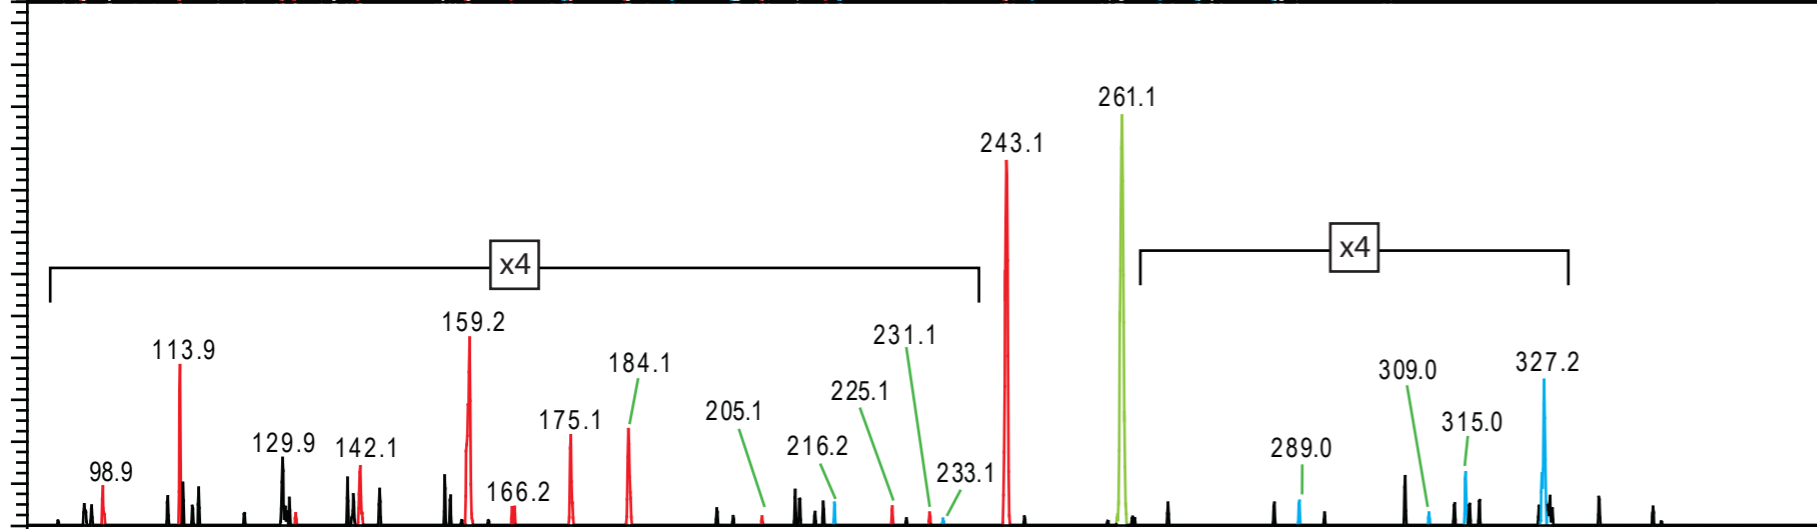

| Fragment | m/z   | +84 Da m/z |
|----------|-------|------------|
| a        | 132.1 | 216.1      |
| b        | 142.1 | -          |
| c        | 149.1 | 233.1      |
| d        | 159.1 | 243.1      |
| e        | 166.1 | -          |
| f        | 175.1 | 259.1      |
| g        | 184.1 | -          |
| h        | 205.1 | 289.1      |
| i        | 215.1 | 299.1      |
| j        | 225.1 | 309.1      |
| k        | 231.1 | 315.1      |
| l        | 243.1 | 327.1      |

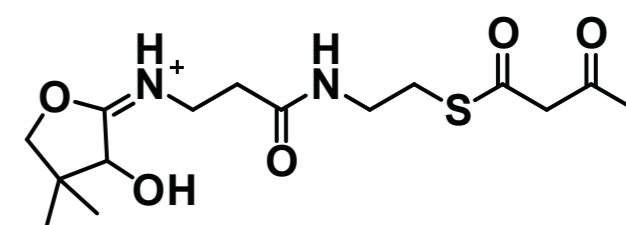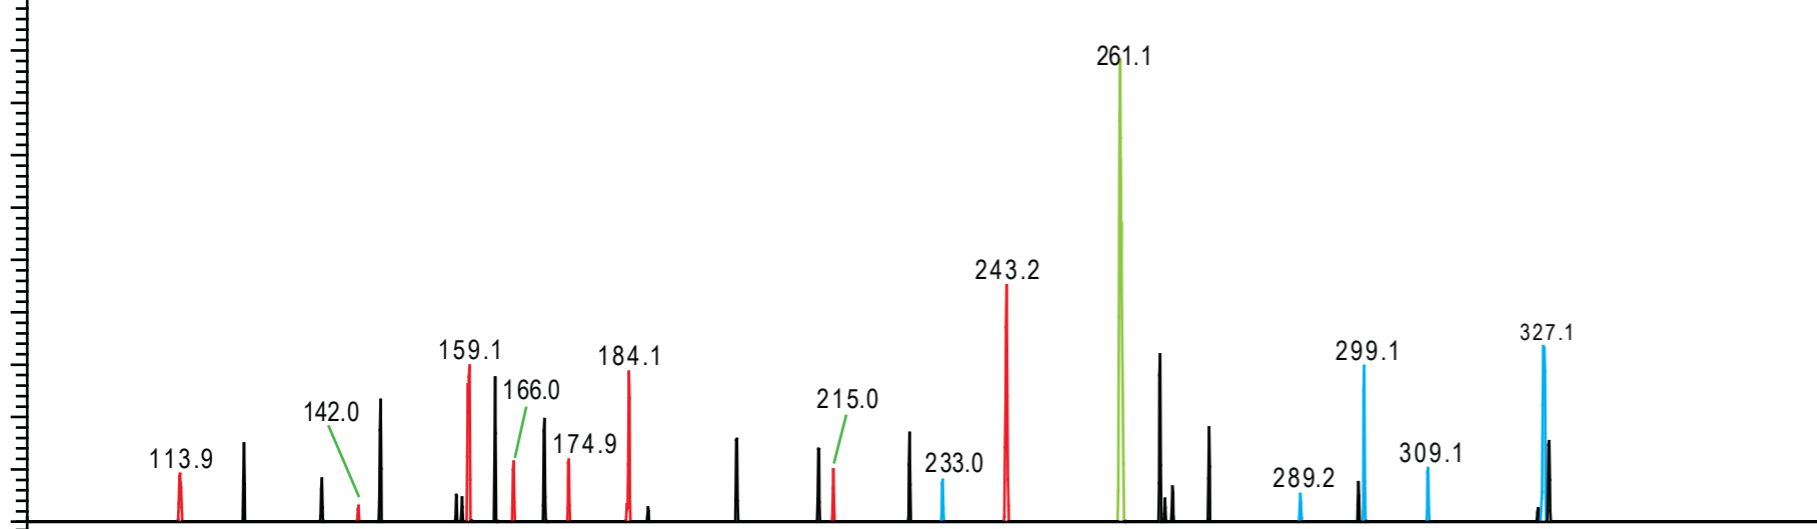

| Fragment | m/z   | +84 Da m/z |
|----------|-------|------------|
| a        | 132.1 | 216.1      |
| b        | 142.1 | -          |
| c        | 149.1 | 233.1      |
| d        | 159.1 | 243.1      |
| e        | 166.1 | -          |
| f        | 175.1 | 259.1      |
| g        | 184.1 | -          |
| h        | 205.1 | 289.1      |
| i        | 215.1 | 299.1      |
| j        | 225.1 | 309.1      |
| k        | 231.1 | 315.1      |
| l        | 243.1 | 327.1      |

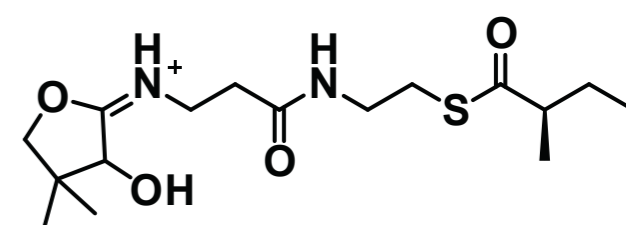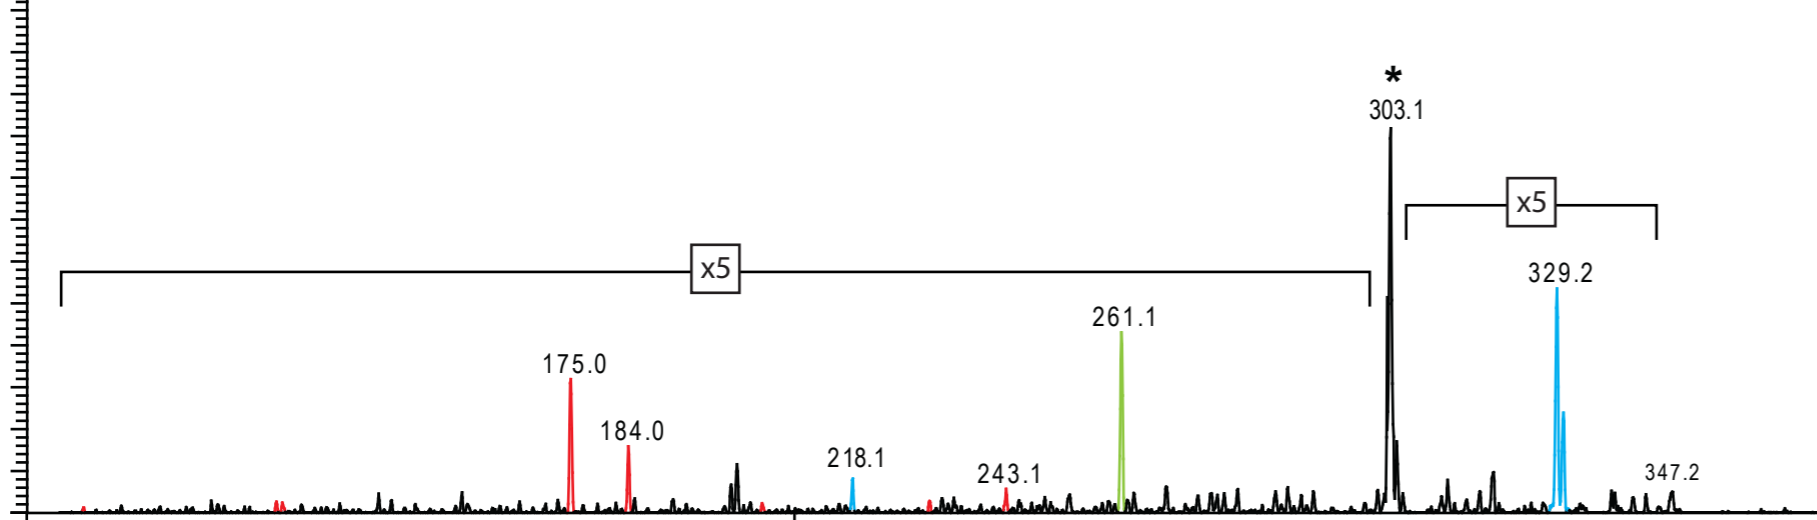

| Fragment | m/z   | +86 Da m/z |
|----------|-------|------------|
| a        | 132.1 | 218.1      |
| b        | 142.1 | -          |
| c        | 149.1 | 235.1      |
| d        | 159.1 | 245.1      |
| e        | 166.1 | -          |
| f        | 175.1 | 261.1      |
| g        | 184.1 | -          |
| h        | 205.1 | 291.1      |
| i        | 215.1 | 301.1      |
| j        | 225.1 | 311.1      |
| k        | 231.1 | 317.1      |
| l        | 243.1 | 329.1      |

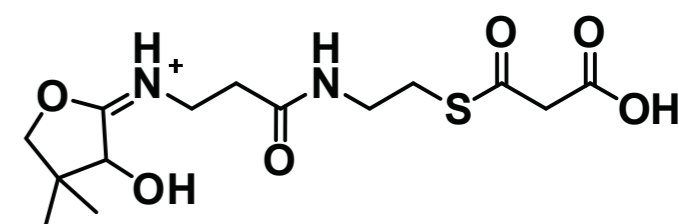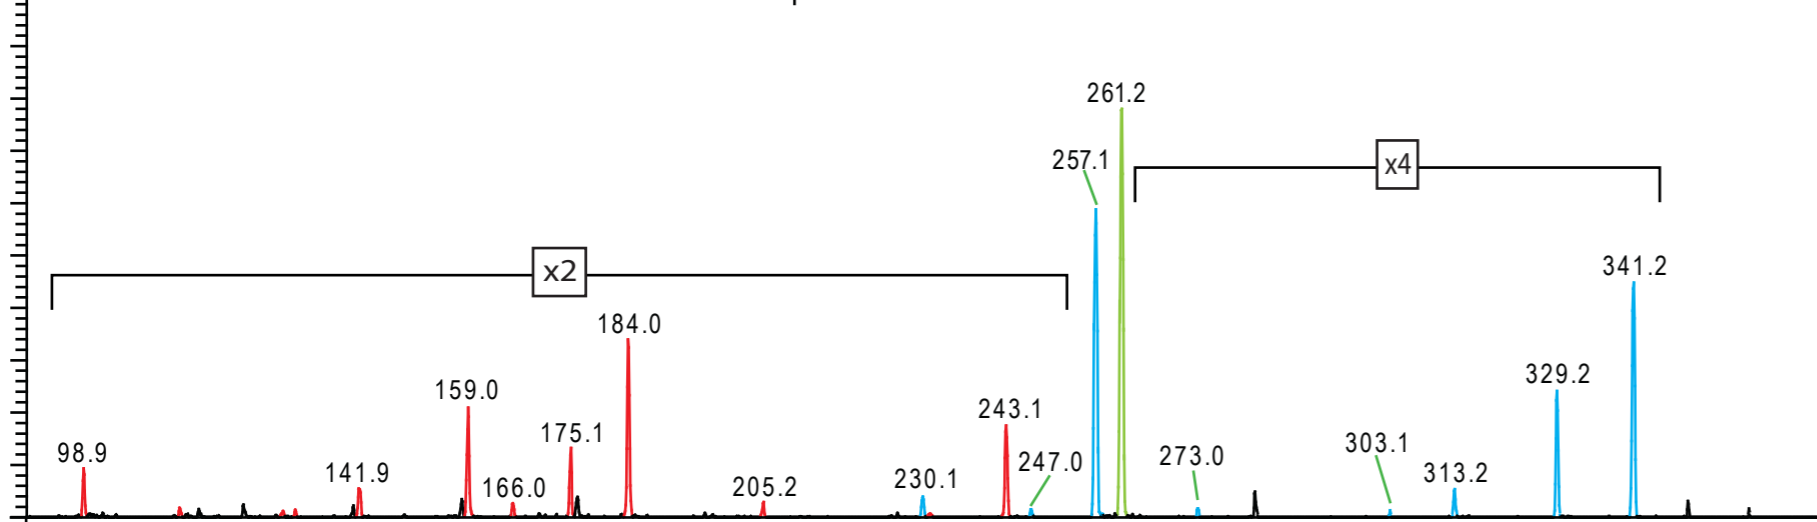

| Fragment | m/z   | +98 Da m/z |
|----------|-------|------------|
| a        | 132.1 | 230.1      |
| b        | 142.1 | -          |
| c        | 149.1 | 247.1      |
| d        | 159.1 | 257.1      |
| e        | 166.1 | -          |
| f        | 175.1 | 273.1      |
| g        | 184.1 | -          |
| h        | 205.1 | 303.1      |
| i        | 215.1 | 313.1      |
| j        | 225.1 | 323.1      |
| k        | 231.1 | 329.1      |
| l        | 243.1 | 341.1      |

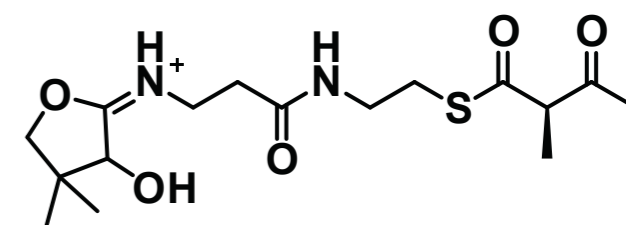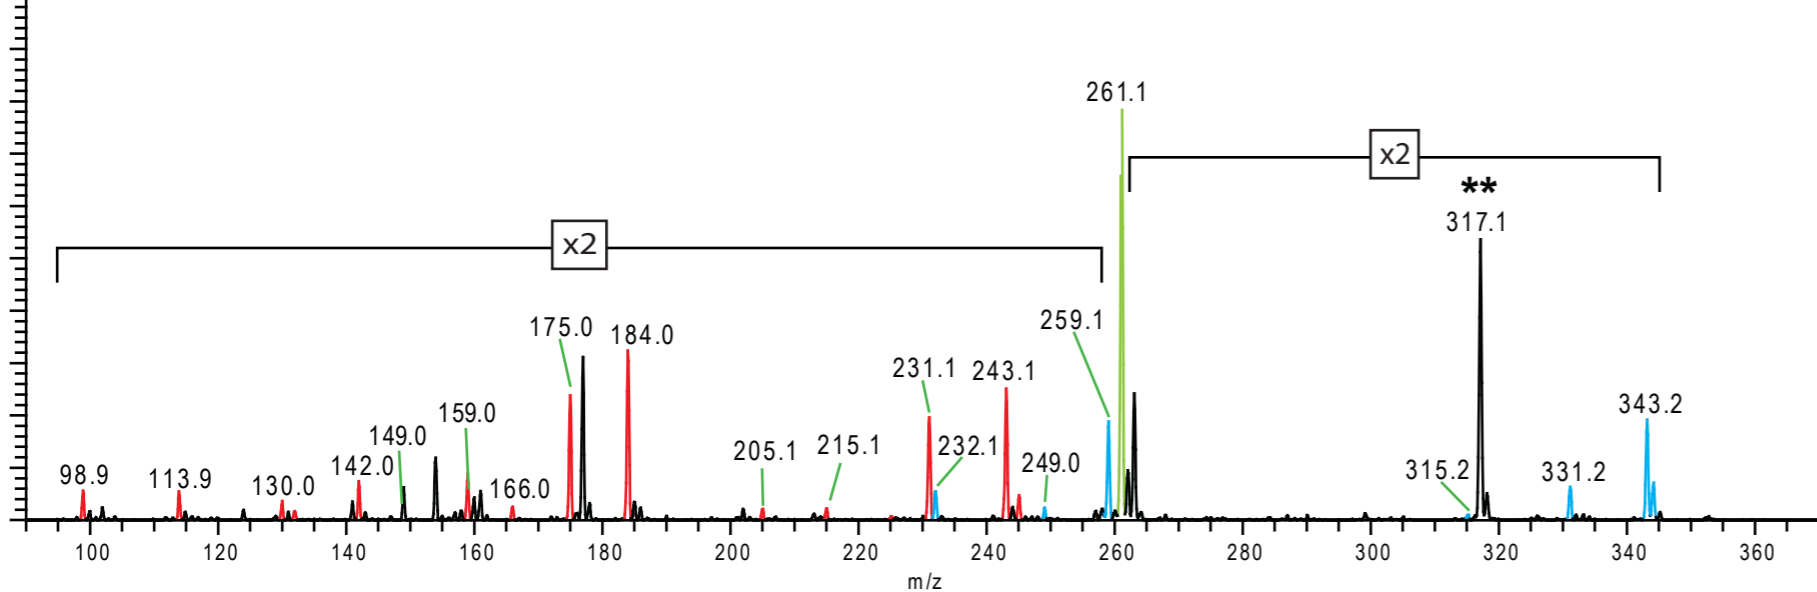

| Fragment | m/z   | +100 Da m/z |
|----------|-------|-------------|
| a        | 132.1 | 232.1       |
| b        | 142.1 | -           |
| c        | 149.1 | 249.1       |
| d        | 159.1 | 259.1       |
| e        | 166.1 | -           |
| f        | 175.1 | 275.1       |
| g        | 184.1 | -           |
| h        | 205.1 | 305.1       |
| i        | 215.1 | 315.1       |
| j        | 225.1 | 325.1       |
| k        | 231.1 | 331.1       |
| l        | 243.1 | 343.1       |

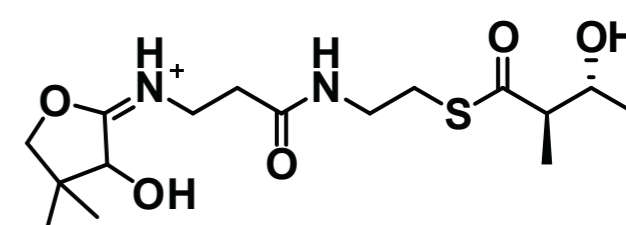

### **Figure SI-1. Linear trap MS3 confirmation of intermediate-loaded pantetheine ejection ions.**

In addition to using FT-ICR-MS2 to verify the identity of all observed intermediate-loaded pantetheine ejection ions, ejection ions were subsequently trapped (during the same experiment) and subjected to additional rounds of tandem-MS. Pantetheine ejection ions yield a characteristic pattern of fragment ions, by which their identity can be confirmed (green colored peaks). The LovF intermediates remained bound to thiol-containing pantetheine fragments, resulting in mass shifts of these fragments (blue colored peaks). Each of the intermediate-loaded pantetheine ejection ions also yielded a prominent peak at 261.1  $m/z$  (red colored peaks) as some of the ejection ions trapped in each experiment released their covalently bound intermediate during CID. Two unique pantetheine ejection ion fragmentation patterns occurred: The malonyl-loaded pantetheine ejection ions were observed to predominantly undergo a McLafferty type rearrangement resulting in acetyl-loaded, intact pantetheine ion (labeled \*) at 303.1  $m/z$ . This ion was trapped and fragmented again in the linear ion trap, giving the same fragmentation pattern that would be observed from MS<sup>3</sup> fragmentation of an actual acetyl-loaded pantetheine ejection ion. MS<sup>3</sup> of the  $\beta$ -hydroxy- $\alpha$ -methylbutyryl-loaded pantetheine ejection produced a moderate amount of the standard fragment ions, but also produced a prominent ion with a mass of 317.1  $m/z$  (labeled \*\*). This mass is consistent with that of a pantetheine ejection ion bearing a 56 Da species ion, and likely was the result of a  $\beta$ -elimination reaction upon MS<sup>3</sup>. Subsequent MS<sup>4</sup> of the 317.1  $m/z$  species resulted in the typical diagnostic pattern of pantetheine ejection ions in which the thiol containing fragments all showed a mass-addition of 56 Da.

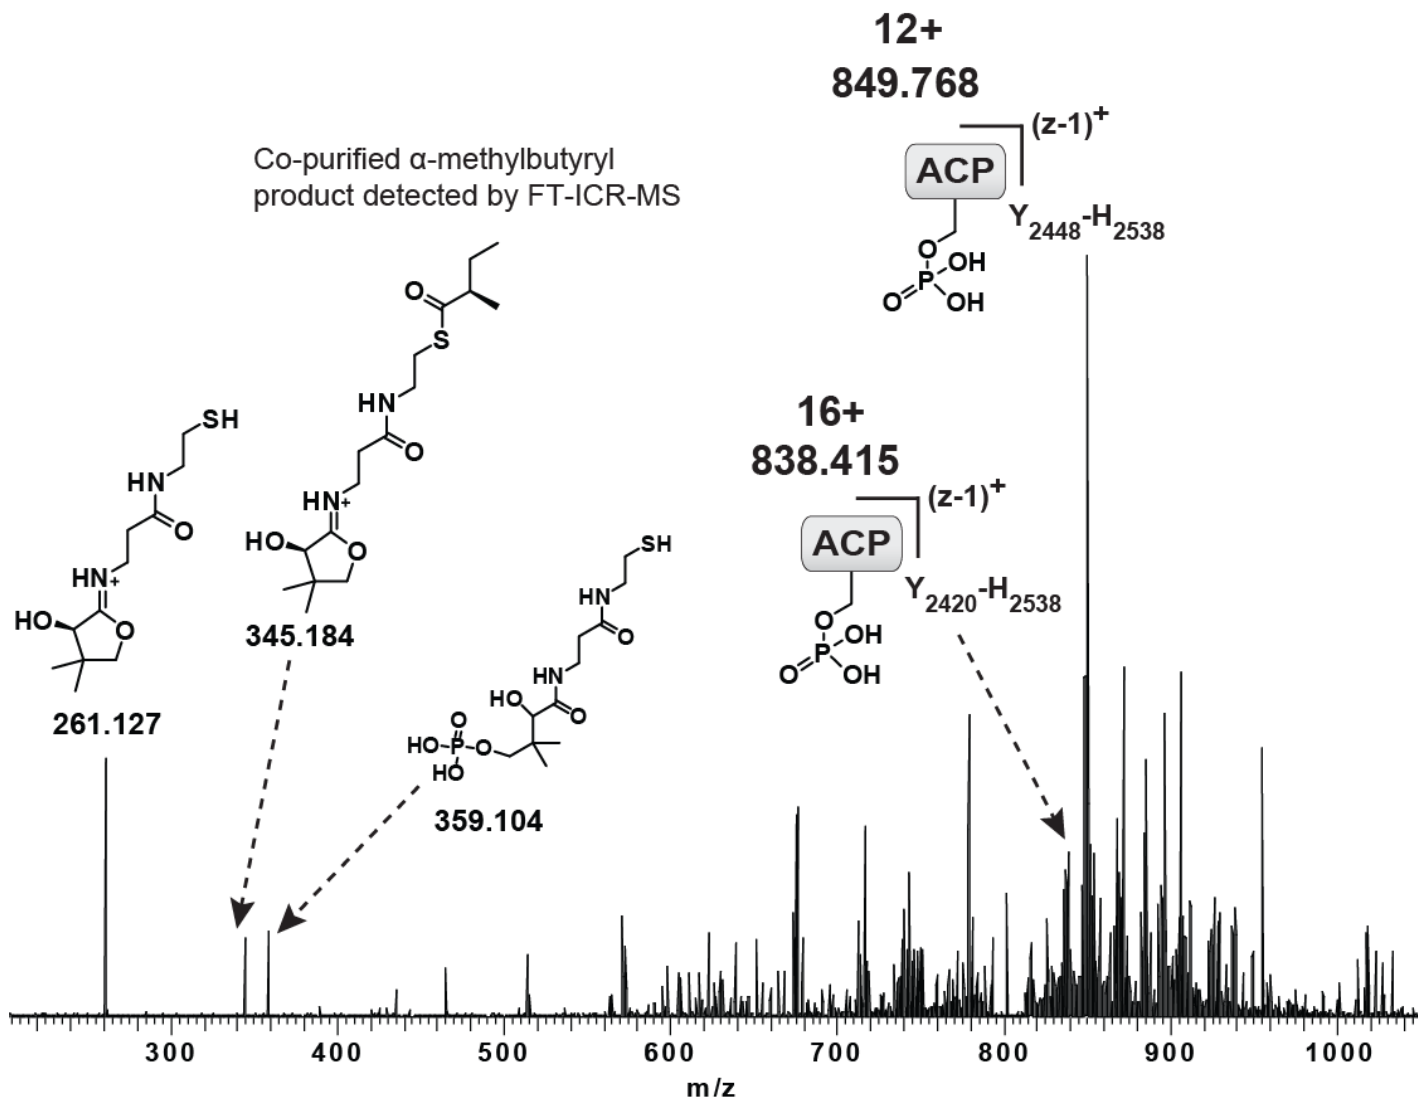

**Figure SI-2. Detection of  $\alpha$ -methylbutyrate by PPant ejection.** FT-ICR-MS<sup>2</sup> of *holo*-LovF active site peptide following incubation with acetoacetyl-CoA, SAM, and NADPH. A low intensity  $\alpha$ -methylbutyryl-loaded PPant ejection ion (345.184 *m/z*) was detected and could be distinguished from the adjacent acetoacetyl-loaded PPant ejection ion (345.148 *m/z*). An increase in the HPLC retention time of the ACP active site bearing covalently bound  $\alpha$ -methylbutyrate resulted overlap in elution times of the Y<sub>2420</sub>-H<sub>2538</sub>  $\alpha$ -methylbutyryl-S-ACP peptide with the Y<sub>2448</sub>-H<sub>2538</sub> ACP peptide bearing other intermediates generated from the *in vitro* reaction. As a result, post-ejection parent phosphopeptides for both Y<sub>2420</sub>-H<sub>2538</sub> and the Y<sub>2448</sub>-H<sub>2538</sub> ACP peptides were detected.
